# Supplementary material for: ChAP 1.0: A stationary tropospheric sulphur cycle for Earth systemmodels of intermediate complexity
Source: Copernicus journal article supplement (doi:10.5194/gmd-2021-24), 2021-02-17
Supplement: Supplementary file [file gmd-2021-24-AC1-supplement.pdf]

*Reply to the reviewer's comments to*  
ChAP 1.0: A stationary tropospheric sulphur  
cycle for Earth system models of intermediate  
complexity

A. V. Eliseev, R.D. Gizatullin, and A.V. Timazhev

October 26, 2021

We are grateful for the reviewer for the constructive comments which led to the improved presentation of our results.

The most important changes in the manuscript are as follows:

- The second referee's suggestions are discussed as limitations of the contemporary version of the scheme and noted as routes to improve it.
- In addition, an issue of distinguishing heavy and light rain in wet deposition calculations is noted and discussed.
- Some typos (in particular those found by the reviewer) are corrected.

This reviewer made only one editorial comment, "*Numbering in Figs. 5-7 do not correspond to the figure captions – there are no designations d, e*".

This was a misprint: items 'b' and 'c' in panel titles were erroneously duplicated. Upon revision, this misprint is corrected.
